# Supplementary material
Source: PubMed Central journal article supplement (PMC2933549)

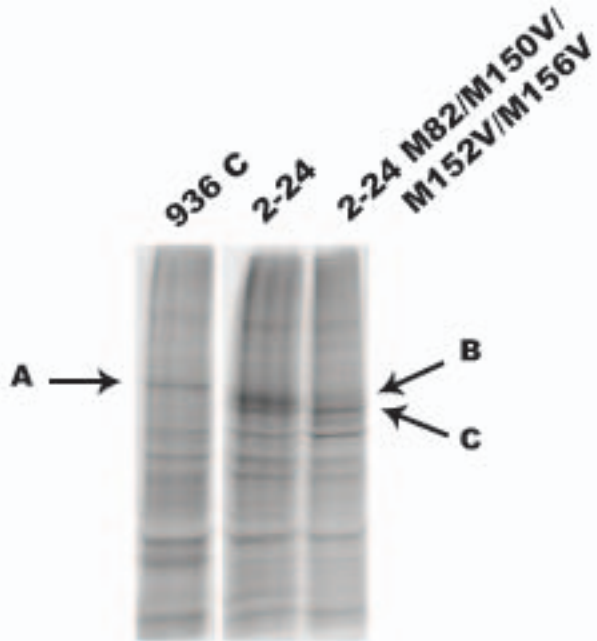

Supplementary Figure 1

Supplement: supp_43_3_334__2.pdf [file supp_43_3_334__2.pdf]

Ov1aSI/2-2A

Ov1aLJ/2-2A

-1a/1a/2-2A

CFTR936C

CFTR2-2A

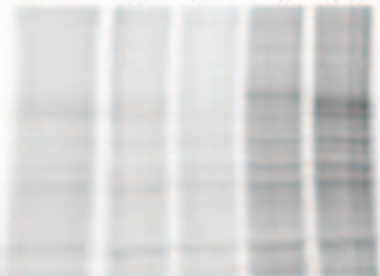

A

B

Supplementary Figure 2

Supplement: supp_43_3_334__3.pdf [file supp_43_3_334__3.pdf]

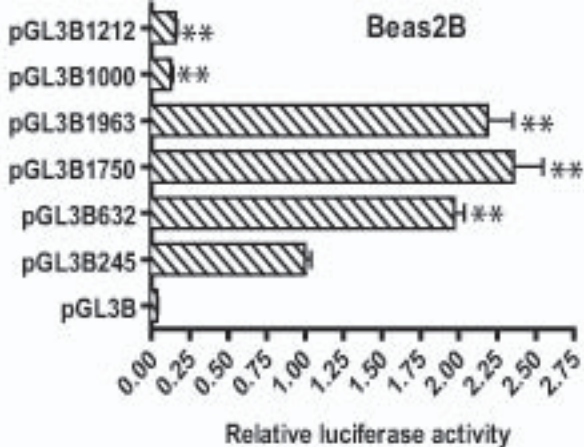

Supplementary Figure 3

Supplement: supp_43_3_334__4.pdf [file supp_43_3_334__4.pdf]

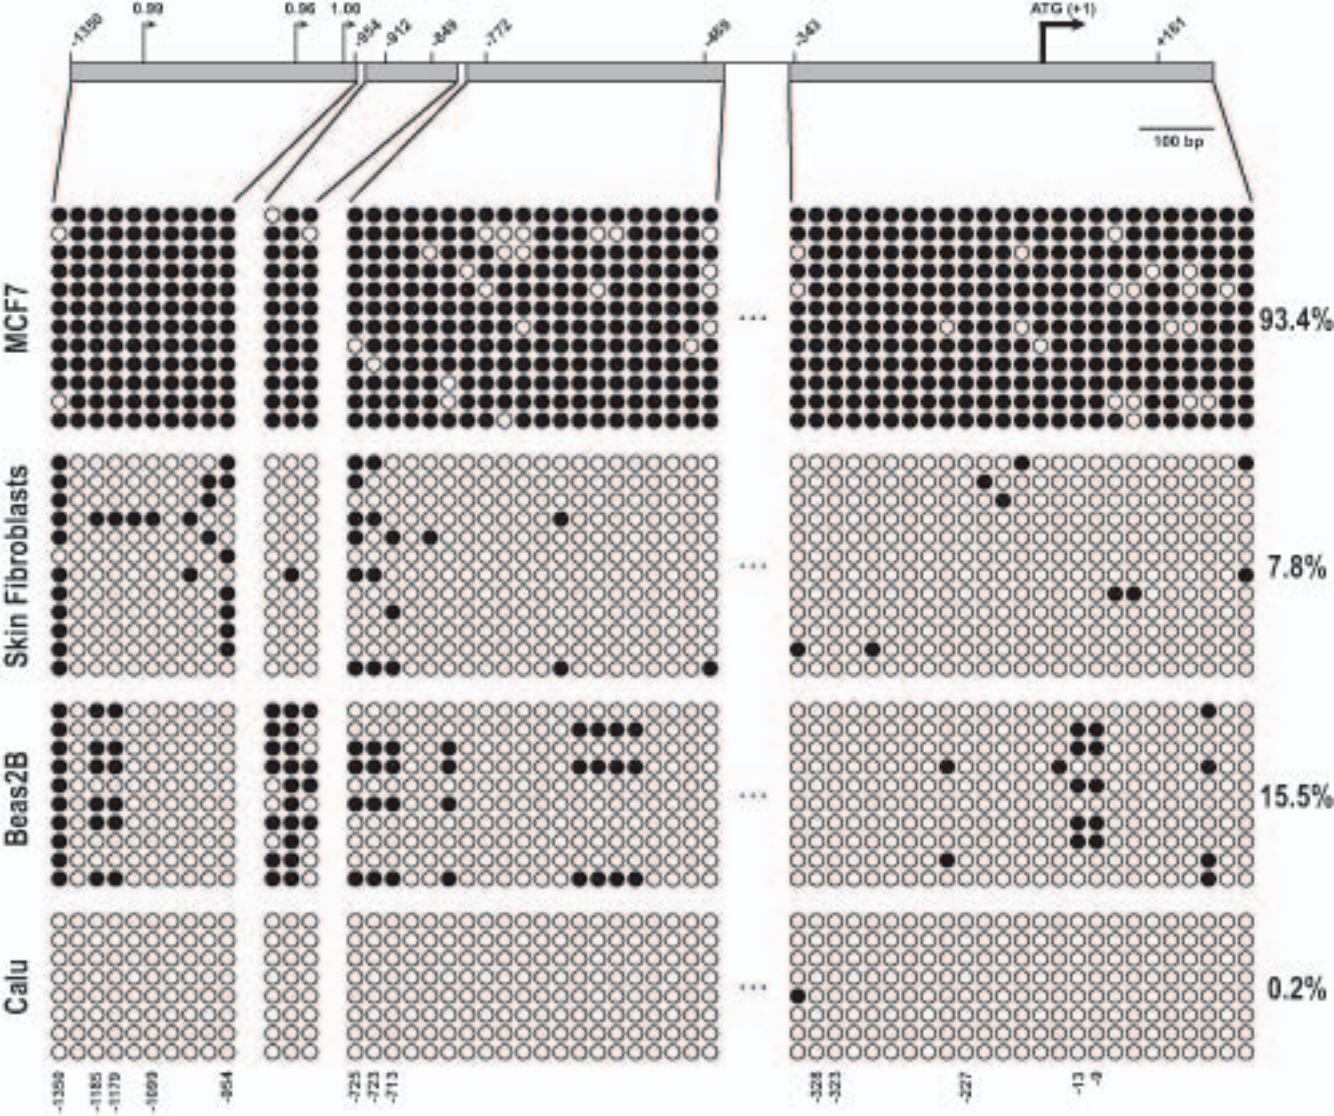

Supplementary Figure 4

Supplement: supp_43_3_334__5.pdf [file supp_43_3_334__5.pdf]
